# Supplementary material
Source: PubMed Central journal article supplement (PMC4991946)
Supplement: NIHMS804331-supplement-SI.pdf [file NIHMS804331-supplement-SI.pdf]

# Supporting Information for “Reliable fragment-based $^1\text{H}$ , $^{13}\text{C}$ , $^{15}\text{N}$ and $^{17}\text{O}$ chemical shift predictions in molecular crystals”

by J. Hartman, R. Kudla, G. Day, L. Mueller, and G. Beran

July 8, 2016

## Contents

|          |                                                             |           |
|----------|-------------------------------------------------------------|-----------|
| <b>1</b> | <b>Benchmark test set composition</b>                       | <b>2</b>  |
| <b>2</b> | <b>Analysis of isotropic shielding predictions</b>          | <b>8</b>  |
| 2.1      | Effects of geometry optimization . . . . .                  | 8         |
| 2.2      | Convergence with respect to basis set . . . . .             | 10        |
| 2.3      | Convergence with two-body cut off distance . . . . .        | 11        |
| 2.4      | Cluster-only linear regression parameters . . . . .         | 13        |
| 2.5      | Test set error distributions . . . . .                      | 14        |
| 2.6      | Statistical cross-validation error distributions . . . . .  | 15        |
| 2.7      | Convergence of GIPAW chemical shifts . . . . .              | 15        |
| <b>3</b> | <b>Tabulated experimental and predicted chemical shifts</b> | <b>19</b> |
| <b>4</b> | <b>Benzoic acid</b>                                         | <b>28</b> |
| <b>5</b> | <b>Conversions between chemical shift scales</b>            | <b>28</b> |
| <b>6</b> | <b>Sample Quantum Espresso geometry optimization job</b>    | <b>30</b> |
| <b>7</b> | <b>Details of NMR experiments performed here</b>            | <b>32</b> |

This supporting info provides 2-D structures for all species included in the  $^1\text{H}$ ,  $^{15}\text{N}$  and  $^{17}\text{O}$  benchmark sets. It also provides details regarding convergence with respect to the model parameters, additional tables of regression parameters, and error distributions from the test sets and the statistical cross validation sets. It also includes complete tables of the experimental and PBE0 chemical shifts used for each test set. CIF files containing the optimized geometries of all crystals in the benchmark tests sets are provided separately. Note that additional details regarding the composition and convergence properties of  $^{13}\text{C}$  test set have been provided previously.[1]

## 1 Benchmark test set composition

Figures S1–S3 depict the molecular structure of each crystal included in the  $^1\text{H}$ ,  $^{15}\text{N}$  and  $^{17}\text{O}$  benchmark sets. Reference codes are provided for structures obtained from the Cambridge Structure Database (CSD). If no reference code is provided, the crystal structure was obtained from the supporting information for the corresponding experimental NMR study. See Ref [1] for details of the  $^{13}\text{C}$  test set.

## Hydrogen test set

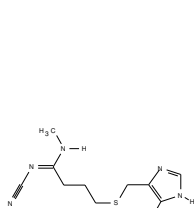

1. Cimetidine  
CIMETD

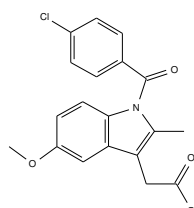

2. Indomethacin  
INDMET

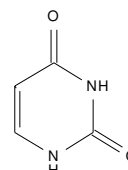

3. Uracil  
URACIL

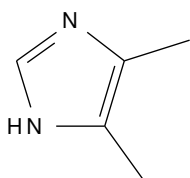

4a. 4,5-dimethylimidazole

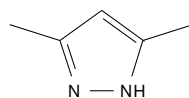

4b. 3,5-Dimethylpyrazole

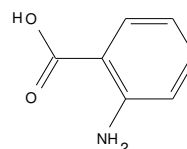

5. Anthranilic acid  
AMBACO05

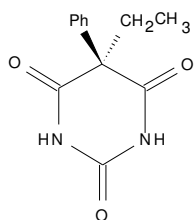

6. Phenobarbital  
PHBARB06

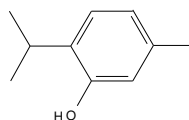

7. Thymol  
IPMEPL

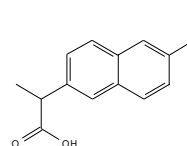

8. Naproxen  
COYRUD11

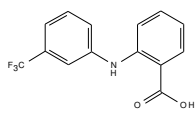

9. Flufenamic acid  
FPAMCA11

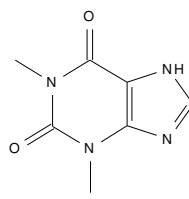

10. Theophylline  
BAPLOT01

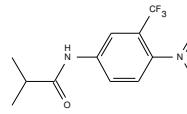

11. Flutamide  
WEZCOT

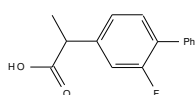

12. Flurbiprofen  
FLUBIP

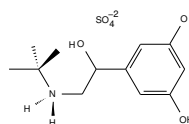

13. Terbutaline  
hemisulfate  
ZIVKAQ

Figure S1: Crystal structures and corresponding CSD reference codes included in the  $^1\text{H}$  benchmark set.

## Nitrogen test set

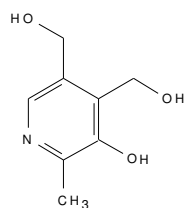

1. Pyridoxine  
BITZAF

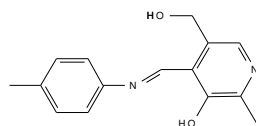

2. N-(Pyridoxylidene)  
tolylamine  
GEHHAD

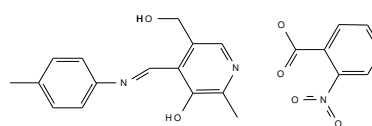

3. N-(Pyridoxylidene)tolylamine  
3,2-nitrobenzoate  
GEHHEH

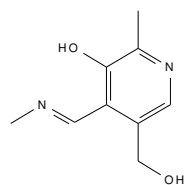

4. N-(Pyridoxylidene)  
methylamine  
GEHHIL

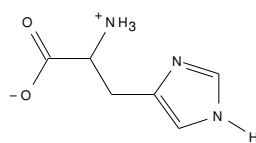

5. L-Histidine  
monoclinic  
LHISTD02

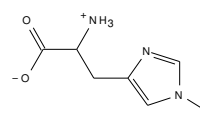

6. L-Histidine  
orthorhombic  
LHISTD13

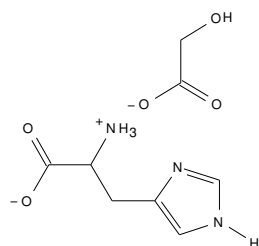

7. L-Histidine  
glycolate  
TEJWAG

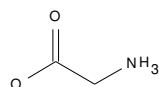

8. Glycine  
GLYCIN03

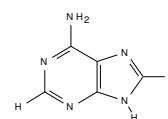

9. Adenine  
trihydrate  
FUSVAQ01

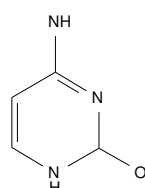

10. Cytosine  
CYTSIN

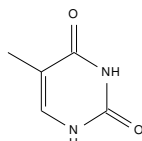

11. Thymine  
THYMIN01

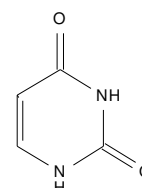

12. Uracil  
URACIL

**Figure S2:** Crystal structures and corresponding CSD reference codes included in the  $^{15}\text{N}$  benchmark set.

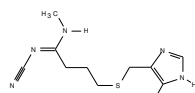

13. Cimetidine  
CIMETD

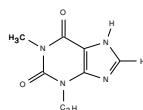

14. Theophylline  
BAPLOT01

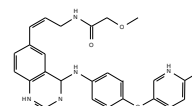

15. Compound 1  
f843

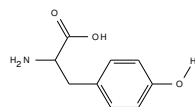

16. L-Tyrosine  
hydrochloride  
LTYRHC10

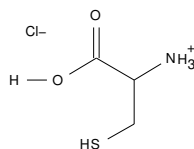

17. L-Cysteine  
hydrochloride monohydrate  
CYSCLM11

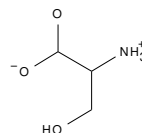

18. Serine  
LSERIN01

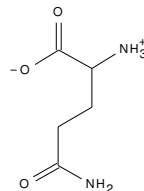

19. L-Glutamine  
GLUTAM01

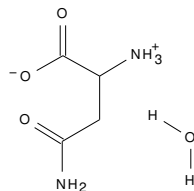

20. L-Asparagine  
monohydrate  
ASPARM03

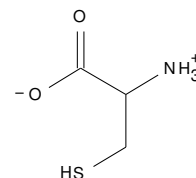

21. L-Cysteine  
LCYSTN21

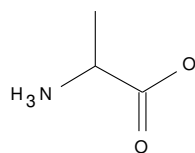

22. D-Alanine  
ALUCAL04

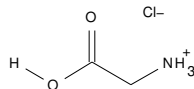

23. Glycine  
hydrochloride  
GLYHCL01

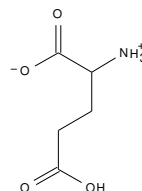

24. L-Glutamic acid  
beta-polymorph  
LGLUAC11

**Figure S2:** (cont.) Crystal structures and corresponding CSD reference codes included in the  $^{15}\text{N}$  benchmark set.

## Oxygen test set

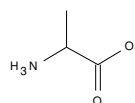

1. Alanine  
LALNIN12

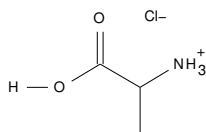

2. L-Alanine  
hydrochloride  
ALAHCL

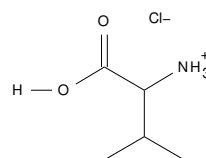

3. L-Valine  
hydrochloride  
VALEHC11

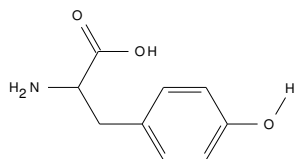

4. L-Tyrosine  
hydrochloride  
LTYRHC10

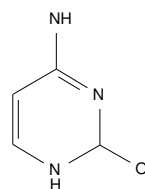

5. Cytosine  
CYTSIN

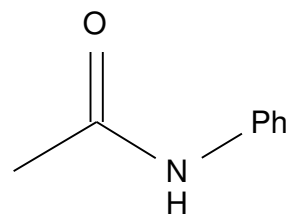

6. Acetanilide  
ACANIL03

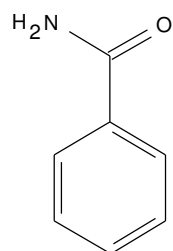

7. Benzamide  
BZAMID07

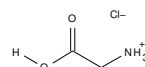

8. Glycine  
hydrochloride  
GLYHCL01

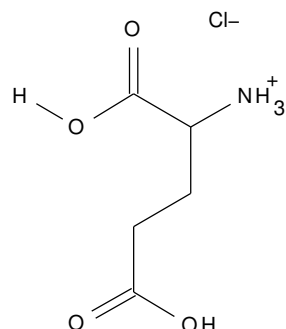

9. L-Glutamic acid  
hydrochloride  
LGLUTA03

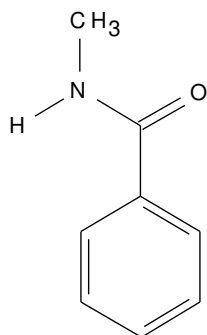

10. N-Methylbenzamide  
MBNZAM10

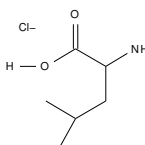

11. L-Leucine  
hydrochloride monohydrate  
FEQYUW

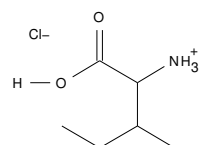

12. L-Isoleucine  
hydrochloride monohydrate  
LILEUC10

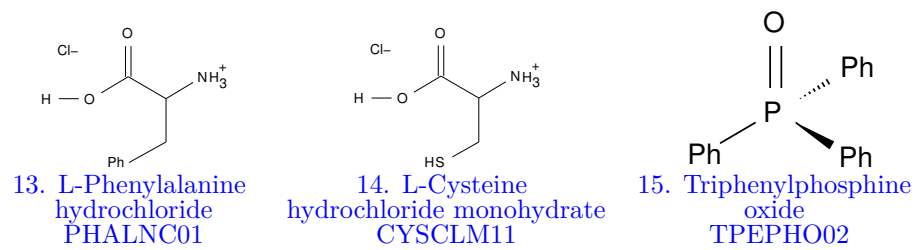

**Figure S3:** (cont.) Crystal structures and corresponding CSD refcodes included in the  $^{17}\text{O}$  benchmark set.

## 2 Analysis of isotropic shielding predictions

The following sections demonstrate convergence of the chemical shifts with respect to the basis set used to optimized the geometries, the locally dense basis set, and the 2-body cutoff distance. They also provide regression parameters and error distributions for the full test set and from the cross-validation experiments.

### 2.1 Effects of geometry optimization

Given the range of plane wave cutoff values reported in the literature and the sensitivity of the chemical shift to local geometry, an assessment of the plane wave cut-off values for all structures in the hydrogen, nitrogen and oxygen test-sets was performed. All-atom fixed-cell geometry optimizations were performed using Quantum Espresso as described in Section 3.2 of the main article using plane wave energy cutoffs of 40 Ry, 60 Ry and 80 Ry for all structures in each test set. Table S1 presents the root-mean-square (RMS) errors as well as linear regression parameters for each optimization scheme.

**Table S1:** RMS errors (in ppm) and linear regression parameters for the hydrogen, nitrogen and oxygen test sets optimized using plane wave cut offs of 40 Ry, 60 Ry and 80 Ry.

|          |           | 40 Ry   | 60 Ry   | 80 Ry   |
|----------|-----------|---------|---------|---------|
| Hydrogen | RMSE      | 0.49    | 0.33    | 0.34    |
|          | Slope     | -0.9135 | -0.9160 | -0.9169 |
|          | Intercept | 28.58   | 28.65   | 28.69   |
| Nitrogen | RMSE      | 4.31    | 4.50    | 4.34    |
|          | Slope     | -1.0296 | -1.0340 | -1.0311 |
|          | Intercept | 197.80  | 198.55  | 198.09  |
| Oxygen   | RMSE      | 9.48    | 9.97    | 9.80    |
|          | Slope     | -1.0568 | -1.0607 | -1.0607 |
|          | Intercept | 269.48  | 270.19  | 270.18  |



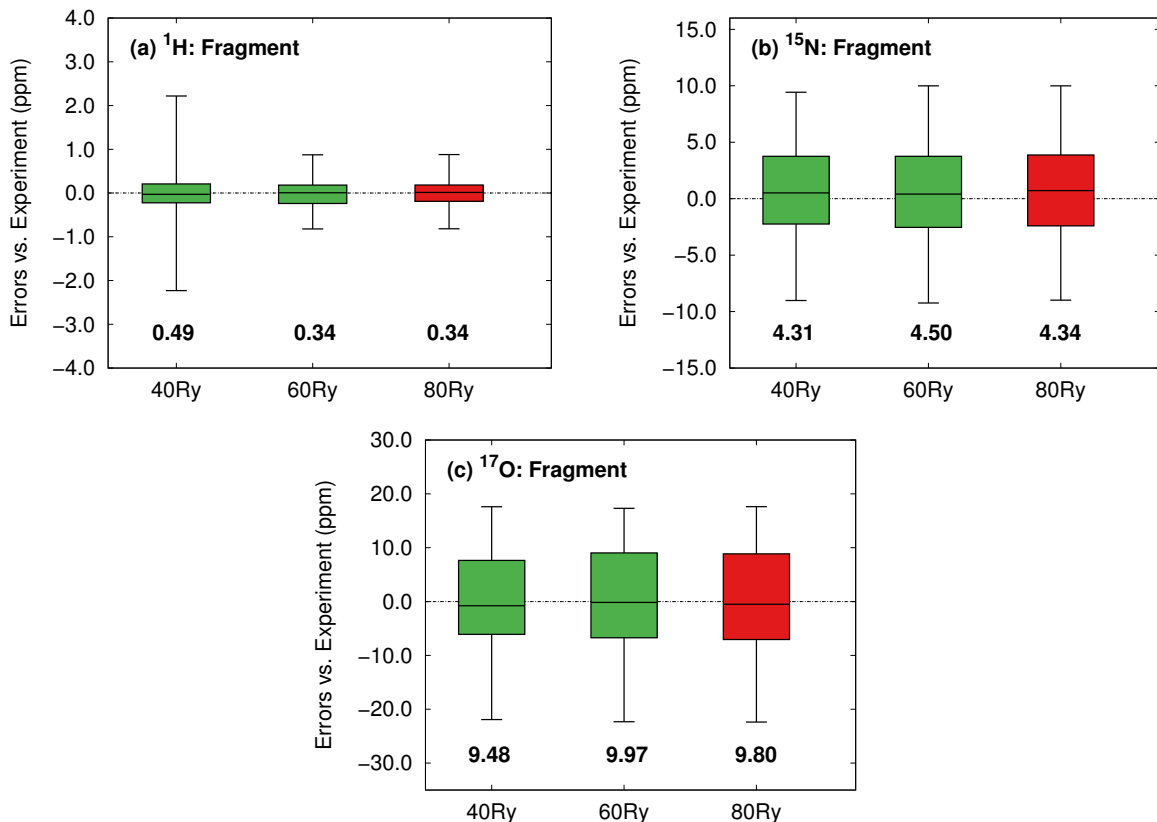

**Figure S4:** Error distributions relative to experiment for PBE0 mixed basis isotropic shielding predictions for the hydrogen, nitrogen and oxygen test sets optimized using plane wave cut offs of 40 Ry, 60 Ry and 80 Ry. The 80 Ry cut off used throughout this work is shown in red.

Although the linear regression parameters for  $^1\text{H}$  are relatively insensitive to the basis set chosen for the geometry optimization, both the RMS errors (Table S1) and the error distributions shown in Figure S4a clearly illustrate the need for large plane wave cut offs of  $\sim 60$  Ry. On the other hand,  $^{15}\text{N}$  and  $^{17}\text{O}$  remain comparatively insensitive to minor changes in geometry. Both the overall RMS errors and linear regression parameters for  $^{15}\text{N}$  and  $^{17}\text{O}$  demonstrate minimal variation (Table S1). Further, the error distributions for  $^{15}\text{N}$  and  $^{17}\text{O}$  show a similar trend (Figures S4b and S4c).

Convergence with respect to  $\mathbf{k}$ -point sampling was carried out for each structure included in this study. All-atom fixed-cell geometry optimizations were performed using an 80 Ry plane wave cut off and a variety of  $\mathbf{k}$ -point spacing. Sufficiently dense  $\mathbf{k}$ -point spacing was chosen for each of the optimized structures used in the  $^1\text{H}$ ,  $^{13}\text{C}$ ,  $^{15}\text{N}$  and  $^{17}\text{O}$  test sets, ensuring convergence to within  $\sim 0.1$  ppm. The  $3 \times 3 \times 3$  grid described in Section 3.2 of the main article proved more than sufficient for most structures. However, the following subset of structures required a denser  $\mathbf{k}$ -point grid. The  $\mathbf{k}$ -point grid used in the optimization is provided in parentheses following each structure: LHISTD02 ( $5 \times 5 \times 5$ ), TEJWAG ( $5 \times 4 \times 3$ ), GLUTAM01 ( $6 \times 5 \times 5$ ), VALEHC11 ( $5 \times 5 \times 5$ ), BZAMID07 ( $6 \times 5 \times 5$ ), LGUTA03 ( $6 \times 5 \times 5$ ).

## 2.2 Convergence with respect to basis set

Four different basis combinations were assessed to explore the effects of basis sets size on the resulting chemical shifts:

- Basis 1: A 6-31G\* basis on all atoms within 4 Å of the asymmetric unit, and a 6-31G basis on the remaining atoms.
- Basis 2: A 6-311G\*\* basis set is used on the asymmetric unit and all atoms within 2 Å, a 6-31G\* basis is used on all atoms between 2 Å and 4 Å of the asymmetric unit, and a 6-31G basis is used on the remaining atoms.
- Basis 3: The locally dense basis described in Section 3.2 of the main article.
- Basis 4: A 6-311+G(2d,p) basis on all atoms.

Figure S5 plots the error distributions with respect to basis set for two-body fragment calculations using the PBE0 density functional and a 6 Å two-body distance cut off for each test set. The RMS errors are provided below each of the error distributions. Although significant variation in the absolute shieldings occur across basis sets, the linear regression largely compensates. Except for the smallest basis for  $^1\text{H}$ , the overall RMS errors and error distributions vary only modestly with basis set size.

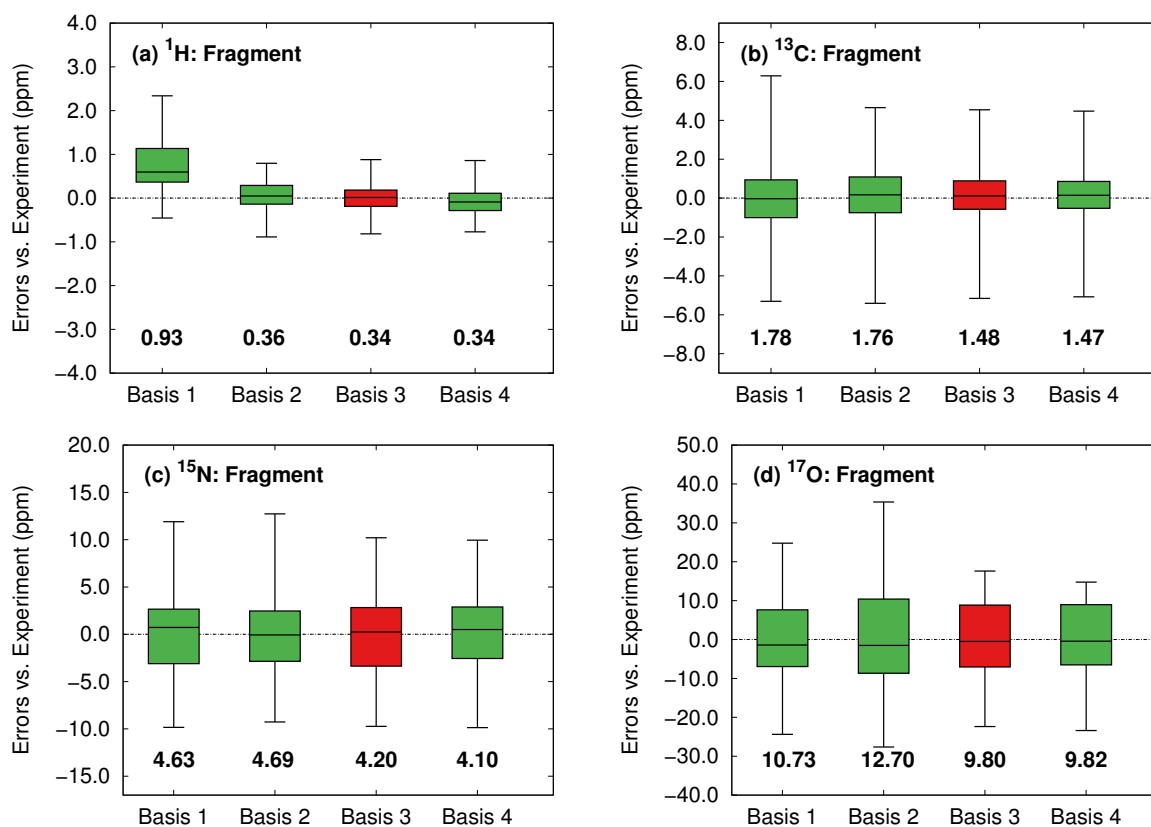

**Figure S5:** Error distributions relative to experiment for two-body fragment PBE0 isotropic shielding predictions for (a)  $^1\text{H}$ , (b)  $^{13}\text{C}$ , (c)  $^{15}\text{N}$  and (d)  $^{17}\text{O}$ . The results from the basis set used in the main article (Basis 3) are indicated in red.

### 2.3 Convergence with two-body cut off distance

Figure S6 plots the PBE0 error distributions with respect to the two-body cut off for the  $^1\text{H}$ ,  $^{15}\text{N}$ , and  $^{17}\text{O}$  test sets. All models with larger two-body cutoffs behave similarly. The resulting scaling parameters for each cut off are shown in in Table S2

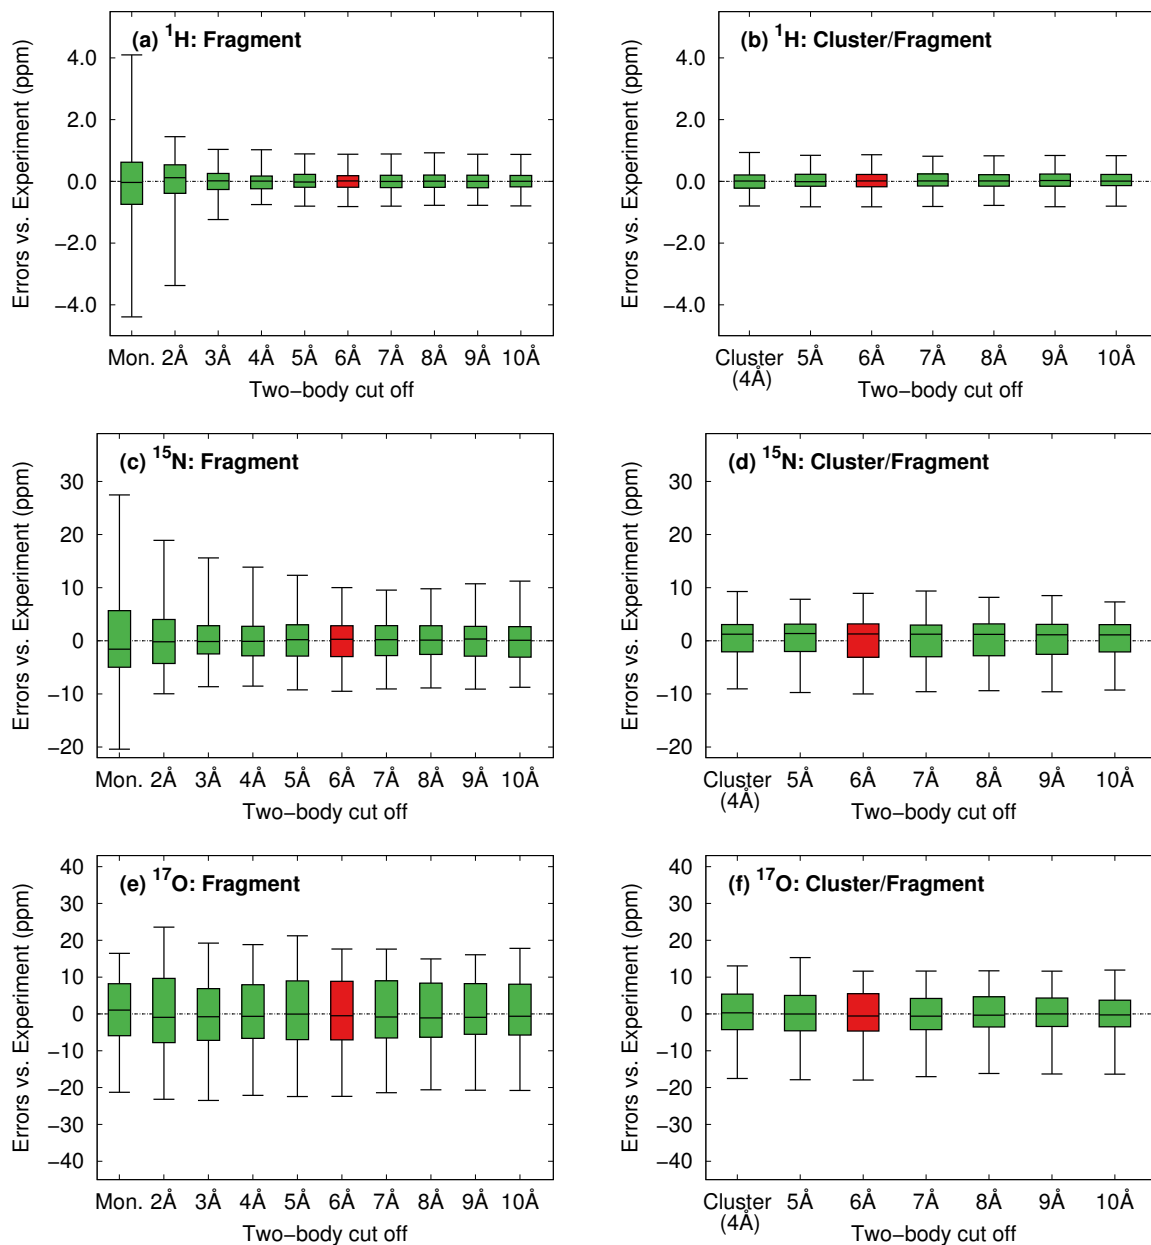

**Figure S6:** Error distributions relative to experiment for PBE0 mixed basis isotropic shielding predictions. The results from the 6 Å cut off used in the main article are indicated in red.

**Table S2:** Scaling parameters and RMS errors (in ppm) for PBE0 mixed basis calculations using different two-body distance cut offs.

| Atom     | 2-body cutoff | 2-Body Fragment Model |         |           | Cluster/Fragment Model |         |           |
|----------|---------------|-----------------------|---------|-----------|------------------------|---------|-----------|
|          |               | RMSE                  | Slope   | Intercept | RMSE                   | Slope   | Intercept |
| Hydrogen | Monomer       | 1.44                  | -1.0966 | 33.54     |                        |         |           |
|          | 2 Å           | 0.82                  | -0.9000 | 27.99     |                        |         |           |
|          | 3 Å           | 0.42                  | -0.9065 | 28.30     |                        |         |           |
|          | 4 Å           | 0.36                  | -0.9198 | 28.66     | 0.37                   | -0.9141 | 28.46     |
|          | 5 Å           | 0.33                  | -0.9177 | 28.67     | 0.33                   | -0.9121 | 28.47     |
|          | 6 Å           | 0.34                  | -0.9169 | 28.69     | 0.35                   | -0.9111 | 28.49     |
|          | 7 Å           | 0.33                  | -0.9191 | 28.75     | 0.34                   | -0.9134 | 28.55     |
|          | 8 Å           | 0.33                  | -0.9199 | 28.76     | 0.34                   | -0.9142 | 28.55     |
|          | 9 Å           | 0.34                  | -0.9202 | 28.76     | 0.34                   | -0.9144 | 28.56     |
|          | 10 Å          | 0.33                  | -0.9211 | 28.80     | 0.34                   | -0.9153 | 28.60     |
| Nitrogen | Monomer       | 8.39                  | -0.9198 | 196.71    |                        |         |           |
|          | 2 Å           | 5.88                  | -0.9838 | 197.81    |                        |         |           |
|          | 3 Å           | 4.41                  | -1.0182 | 197.97    |                        |         |           |
|          | 4 Å           | 4.26                  | -1.0208 | 197.58    | 3.86                   | -1.0004 | 196.91    |
|          | 5 Å           | 4.20                  | -1.0227 | 197.73    | 3.95                   | -1.0021 | 197.05    |
|          | 6 Å           | 4.22                  | -1.0232 | 197.89    | 4.07                   | -1.0025 | 197.19    |
|          | 7 Å           | 4.20                  | -1.0229 | 197.88    | 4.02                   | -1.0022 | 197.19    |
|          | 8 Å           | 4.13                  | -1.0227 | 197.85    | 3.94                   | -1.0020 | 197.15    |
|          | 9 Å           | 4.15                  | -1.0234 | 197.93    | 3.91                   | -1.0028 | 197.24    |
|          | 10 Å          | 4.18                  | -1.0239 | 198.03    | 3.85                   | -1.0033 | 197.35    |
| Oxygen   | Monomer       | 9.63                  | -0.9008 | 279.48    |                        |         |           |
|          | 2 Å           | 10.71                 | -0.9832 | 275.24    |                        |         |           |
|          | 3 Å           | 10.22                 | -1.0447 | 271.19    |                        |         |           |
|          | 4 Å           | 9.94                  | -1.0460 | 269.81    | 8.10                   | -1.0350 | 271.19    |
|          | 5 Å           | 9.87                  | -1.0515 | 269.71    | 7.93                   | -1.0406 | 271.11    |
|          | 6 Å           | 9.80                  | -1.0607 | 270.18    | 7.55                   | -1.0502 | 271.60    |
|          | 7 Å           | 9.73                  | -1.0581 | 270.07    | 7.70                   | -1.0472 | 271.48    |
|          | 8 Å           | 9.33                  | -1.0545 | 269.75    | 7.44                   | -1.0431 | 271.14    |
|          | 9 Å           | 9.43                  | -1.0516 | 269.55    | 7.60                   | -1.0402 | 270.94    |
|          | 10 Å          | 9.61                  | -1.0505 | 269.47    | 7.74                   | -1.0394 | 270.87    |

## 2.4 Cluster-only linear regression parameters

Although we do not generally recommend a cluster-only model, since modest improvements can be obtained at low computational cost by either a two-body fragment only model ( $^1\text{H}$ ,  $^{13}\text{C}$ , or  $^{15}\text{N}$ ) or by including longer-range two-body interactions via the combined cluster/fragment approach ( $^{17}\text{O}$ ), Table S3 reports scaling parameters based on an electrostatically embedded 4 Å cluster model.

**Table S3:** Linear regression parameters for PBE0 mixed basis calculations using a 4 Å cluster model with electrostatic embedding.

| Atom     | 2-body cutoff | RMSE | Slope   | Intercept |
|----------|---------------|------|---------|-----------|
| Hydrogen | OPBE          | 0.39 | -0.9351 | 29.02     |
|          | PBE           | 0.38 | -0.9290 | 28.76     |
|          | TPSS          | 0.37 | -0.9322 | 29.18     |
|          | TPSSh         | 0.37 | -0.9270 | 29.05     |
|          | PBE0          | 0.37 | -0.9141 | 28.46     |
|          | B3LYP         | 0.37 | -0.9172 | 28.69     |
| Carbon   | OPBE          | 1.93 | -1.0588 | 194.59    |
|          | PBE           | 2.14 | -1.0236 | 180.18    |
|          | TPSS          | 2.22 | -1.0415 | 185.68    |
|          | TPSSh         | 1.88 | -1.0159 | 184.75    |
|          | PBE0          | 1.53 | -0.9657 | 179.42    |
|          | B3LYP         | 1.54 | -0.9682 | 173.63    |
| Nitrogen | OPBE          | 6.44 | -1.1041 | 215.04    |
|          | PBE           | 5.74 | -1.0582 | 197.39    |
|          | TPSS          | 5.83 | -1.0833 | 205.93    |
|          | TPSSh         | 5.22 | -1.0595 | 205.23    |
|          | PBE0          | 3.85 | -1.1041 | 196.87    |
|          | B3LYP         | 4.30 | -0.9975 | 190.89    |
| Oxygen   | OPBE          | 9.11 | -1.1205 | 281.17    |
|          | PBE           | 8.96 | -1.1125 | 263.90    |
|          | TPSS          | 9.13 | -1.1340 | 277.88    |
|          | TPSSh         | 8.71 | -1.0994 | 279.57    |
|          | PBE0          | 8.10 | -1.0350 | 271.19    |
|          | B3LYP         | 7.97 | -1.0408 | 266.10    |

## 2.5 Test set error distributions

Figure S7 plots the error distributions for each test set. The error distributions are loosely normal, with  $\sim 68\%$  of the data falling within  $\pm 1$  standard deviation and  $\sim 95\%$  of the data falling within  $\pm 2$  standard deviations of the mean.

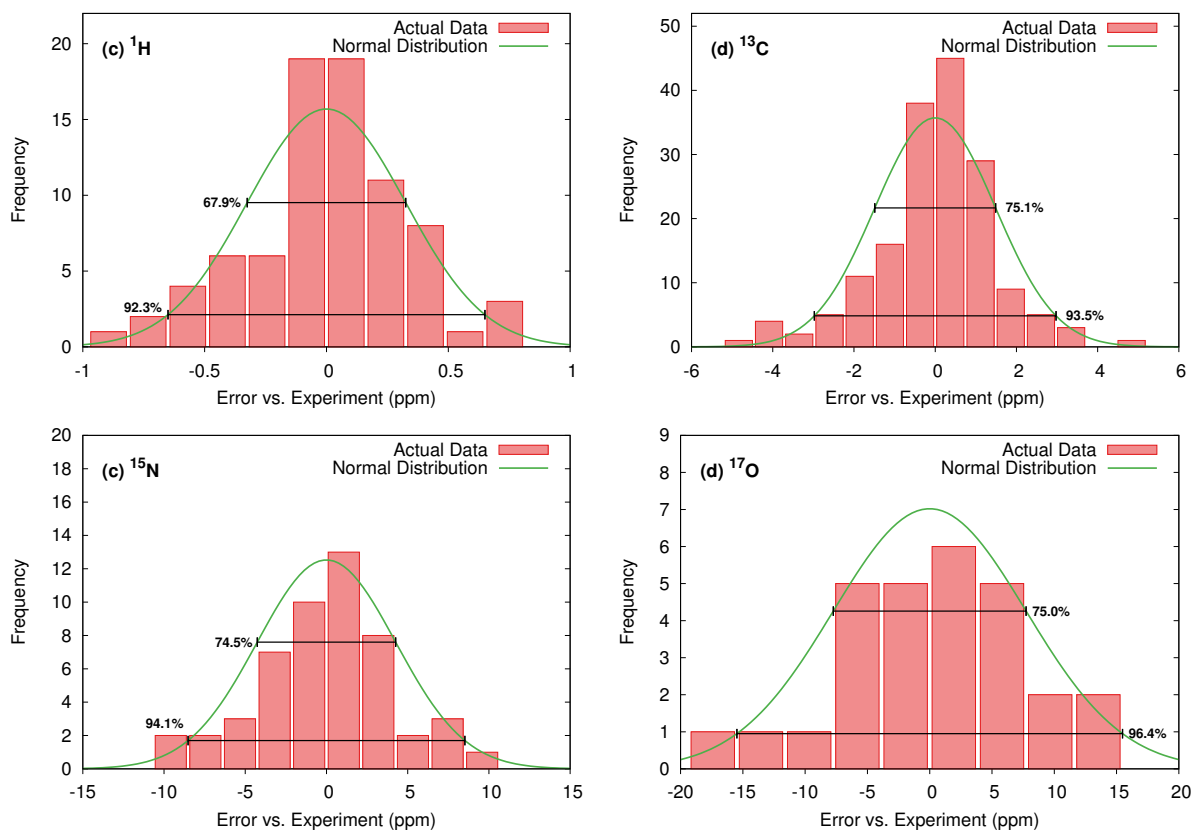

**Figure S7:** Error distributions relative to experiment for PBE0 mixed basis isotropic shielding predictions using the fragment 2-body ( $^1\text{H}$ ,  $^{13}\text{C}$ , or  $^{15}\text{N}$ ) or cluster/fragment ( $^{17}\text{O}$ ) models. Histogram bin widths correspond to half a standard deviation, and fraction of the data falling within  $\pm 1$  or  $\pm 2$  standard deviations is noted.

## 2.6 Statistical cross-validation error distributions

Figure S8 plots the complete error distributions over all possible  $N$ -choose-5 cross-validation experiments for each test set. These errors correspond to the errors for the predictions of the five crystals not included in the fit for each possible composition of the training and validation subsets. The hydrogen, carbon, and nitrogen results are based on the 2-body fragment model, while the oxygen results are for the combined cluster/fragment model. The widths of these distributions are fairly similar to those of the error distributions obtained by simply fitting to the entire set (Figure S7).

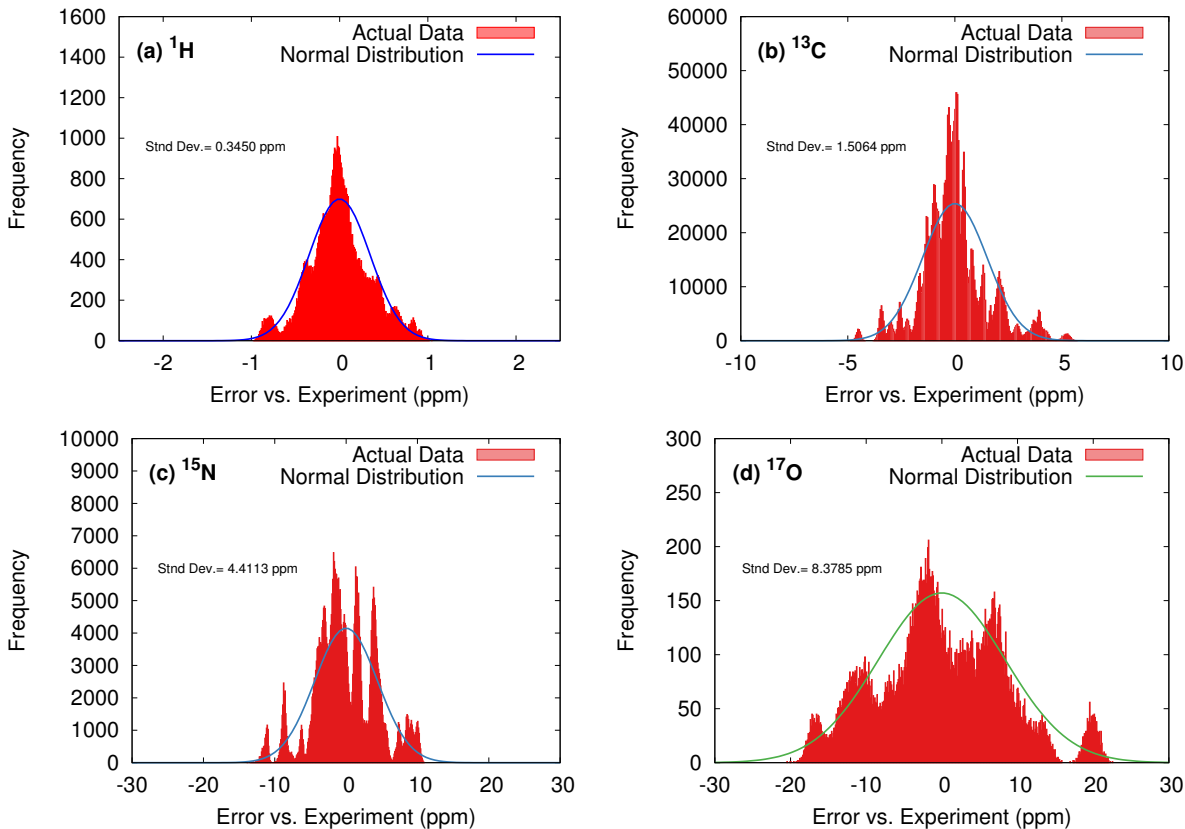

**Figure S8:** Individual errors in the predicted isotropic shifts relative to experiment for all  $N$ -choose-5 permutations for each of the respective test sets.

## 2.7 Convergence of GIPAW chemical shifts

The convergence of isotropic shieldings calculated using the GIPAW approach was examined for three crystal structures selected from the benchmark sets. Table S4 shows convergence with respect to the planewave basis set cutoff energy. Absolute chemical shieldings of  $^{13}\text{C}$ ,  $^{15}\text{N}$  and  $^{17}\text{O}$  have converged to within 0.06 ppm once the basis set is increased to 1050 eV and 0.01 ppm using a 1150 eV cutoff, while convergence of  $^1\text{H}$  is achieved at a smaller basis set (0.04 ppm convergence using a 850 eV cutoff, 0.01 ppm using a 950 eV cutoff). Comparison of relative shieldings shows that their values are converged earlier than absolute shieldings; 0.05 ppm convergence is achieved for all nuclei using an 850 eV basis set cutoff, which we have chosen for all benchmark calculations. Convergence of calculated shieldings with respect to the density of the  $\mathbf{k}$ -point grid is shown in Table S5, which demonstrates only weak dependence of results on the chosen  $\mathbf{k}$ -point grid. A 0.05

$\text{\AA}^{-1}$  target spacing between  $\mathbf{k}$ -points reproduces the shieldings calculated using a much denser  $0.03 \text{\AA}^{-1}$  grid to within 0.03 ppm.

**Table S4:** Calculated chemical shielding of selected nuclei in the crystal structures of L-alanine (LALNIN12), benzamide (BZAMID07) and flutamide (WEZCOT), showing convergence with respect to the planewave basis set cutoff energy. Atoms are labeled as in the reported crystal structures. Errors are calculated with respect to the largest basis set in each case (1250 eV for O, N, C, 1050 eV for H). All calculations were performed with a  $\mathbf{k}$ -point grid chosen to have a maximum spacing of  $0.04 \text{\AA}^{-1}$ .

| Structure | Atom          | Basis Set Cutoff (in eV)      |        |        |        |        |        |        |        |
|-----------|---------------|-------------------------------|--------|--------|--------|--------|--------|--------|--------|
|           |               | 550                           | 650    | 750    | 850    | 950    | 1050   | 1150   | 1250   |
| BZAMID07  | O             | calculated shielding (in ppm) |        |        |        |        |        |        |        |
|           |               | -36.41                        | 41.45  | -42.36 | -42.23 | -42.02 | -41.89 | -41.84 | -41.83 |
|           |               | error with respect to 1250 eV |        |        |        |        |        |        |        |
|           |               | 5.41                          | 0.38   | -0.53  | -0.40  | -0.19  | -0.06  | -0.01  | -      |
| LALNIN12  | O1            | calculated shielding (in ppm) |        |        |        |        |        |        |        |
|           |               | -40.26                        | -45.23 | -46.15 | -46.01 | -45.79 | -45.67 | -45.62 | -45.61 |
|           |               | error with respect to 1250 eV |        |        |        |        |        |        |        |
|           |               | 5.35                          | 0.38   | -0.54  | -0.40  | -0.18  | -0.06  | -0.01  | -      |
| LALNIN12  | O2            | calculated shielding (in ppm) |        |        |        |        |        |        |        |
|           |               | -20.88                        | -25.64 | -26.52 | -26.41 | -26.19 | -26.07 | -26.02 | -26.02 |
|           |               | error with respect to 1250 eV |        |        |        |        |        |        |        |
|           |               | 5.14                          | 0.38   | -0.50  | -0.39  | -0.17  | -0.05  | 0.00   | -      |
| BZAMID07  | N             | calculated shielding (in ppm) |        |        |        |        |        |        |        |
|           |               | 112.78                        | 110.05 | 109.53 | 109.58 | 109.70 | 109.77 | 109.80 | 109.81 |
|           |               | error with respect to 1250 eV |        |        |        |        |        |        |        |
|           |               | 2.97                          | 0.24   | -0.28  | -0.23  | -0.11  | -0.04  | -0.01  | -      |
| LALNIN12  | N             | calculated shielding (in ppm) |        |        |        |        |        |        |        |
|           |               | 186.34                        | 184.17 | 183.74 | 183.78 | 183.87 | 183.93 | 183.95 | 183.96 |
|           |               | error with respect to 1250 eV |        |        |        |        |        |        |        |
|           |               | 2.38                          | 0.21   | -0.22  | -0.18  | -0.09  | -0.03  | -0.01  | -      |
| BZAMID07  | C1 (aromatic) | calculated shielding (in ppm) |        |        |        |        |        |        |        |
|           |               | 33.29                         | 32.73  | 32.70  | 32.74  | 32.76  | 32.76  | 32.75  | 32.74  |
|           |               | error with respect to 1250 eV |        |        |        |        |        |        |        |
|           |               | 0.55                          | -0.01  | -0.04  | 0.00   | 0.02   | 0.02   | 0.01   | -      |
| BZAMID07  | C4 (amide)    | calculated shielding (in ppm) |        |        |        |        |        |        |        |
|           |               | -2.07                         | -2.77  | -2.83  | -2.79  | -2.78  | -2.79  | -2.80  | -2.81  |
|           |               | error with respect to 1250 eV |        |        |        |        |        |        |        |
|           |               | 0.74                          | 0.04   | -0.02  | 0.02   | 0.03   | 0.02   | 0.01   | -      |
| LALNIN12  | C1 (carboxyl) | calculated shielding (in ppm) |        |        |        |        |        |        |        |

*Continued on next page*



Table S4 – *Continued from previous page*

| Structure | Atom          | Basis Set Cutoff (in eV) |        |                               |        |        |        |        |        |
|-----------|---------------|--------------------------|--------|-------------------------------|--------|--------|--------|--------|--------|
|           |               | 550                      | 650    | 750                           | 850    | 950    | 1050   | 1150   | 1250   |
|           |               | -9.52                    | -10.16 | -10.26                        | -10.21 | -10.20 | -10.22 | -10.23 | -10.24 |
|           |               |                          |        | error with respect to 1250 eV |        |        |        |        |        |
|           |               | 0.72                     | 0.08   | -0.02                         | 0.03   | 0.04   | 0.02   | 0.01   | -      |
| WEZCOT    | H1 (aromatic) |                          |        | calculated shielding (in ppm) |        |        |        |        |        |
|           |               | 22.96                    | 23.07  | 23.14                         | 23.18  | 23.21  | 23.22  |        |        |
|           |               |                          |        | error with respect to 1050 eV |        |        |        |        |        |
|           |               | -0.26                    | -0.15  | -0.08                         | -0.04  | -0.01  | -      |        |        |
| WEZCOT    | H4 (N-H)      |                          |        | calculated shielding (in ppm) |        |        |        |        |        |
|           |               | 21.08                    | 21.18  | 21.24                         | 21.28  | 21.30  | 21.31  |        |        |
|           |               |                          |        | error with respect to 1050 eV |        |        |        |        |        |
|           |               | -0.23                    | -0.13  | -0.07                         | -0.03  | -0.01  | -      |        |        |
| WEZCOT    | H5 (C-H)      |                          |        | calculated shielding (in ppm) |        |        |        |        |        |
|           |               | 28.25                    | 28.37  | 28.44                         | 28.48  | 28.51  | 28.52  |        |        |
|           |               |                          |        | error with respect to 1050 eV |        |        |        |        |        |
|           |               | -0.27                    | -0.15  | -0.08                         | -0.04  | -0.01  | -      |        |        |

**Table S5:** Calculated chemical shielding (in ppm) of selected nuclei in the crystal structures of L-alanine (LALNIN12) and benzamide (BZAMID07) showing convergence with respect to the density of the electronic  $\mathbf{k}$ -point grid. All calculations were performed with a basis set cutoff of 1050 eV. For BZAMID07, the chosen grids correspond to 4, 4, 15 and 24  $\mathbf{k}$ -points in the irreducible Brillouin Zone for 0.06, 0.05, 0.04 and 0.03  $\text{\AA}^{-1}$ , respectively. For LALNIN12, the grids correspond to 4, 4, 18 and 18  $\mathbf{k}$ -points in the irreducible Brillouin Zone.

| Structure | Atom          | Target spacing between $\mathbf{k}$ -points ( $\text{\AA}^{-1}$ ) |        |        |        |
|-----------|---------------|-------------------------------------------------------------------|--------|--------|--------|
|           |               | 0.06                                                              | 0.05   | 0.04   | 0.03   |
| BZAMID07  | O             | -41.92                                                            | -41.88 | -41.89 | -41.88 |
| LALNIN12  | O1            | -45.71                                                            | -45.70 | -45.67 | -45.68 |
| LALNIN12  | O2            | -26.09                                                            | -26.11 | -26.07 | -26.09 |
| BZAMID07  | N             | 109.70                                                            | 109.75 | 109.77 | 109.76 |
| LALNIN12  | N             | 183.88                                                            | 183.89 | 183.93 | 183.91 |
| BZAMID07  | C1 (aromatic) | 32.72                                                             | 32.73  | 32.76  | 32.76  |
| BZAMID07  | C4 (amide)    | -2.79                                                             | -2.81  | -2.79  | -2.79  |
| LALNIN12  | C1 (carboxyl) | -10.21                                                            | -10.25 | -10.22 | -10.23 |

### 3 Tabulated experimental and predicted chemical shifts

Tables S4–S7 list the experimental and PBE0-predicted chemical shifts for every species included in the  $^1\text{H}$ ,  $^{13}\text{C}$ ,  $^{15}\text{N}$ , and  $^{17}\text{O}$  test sets, respectively. Note, due to a slightly different geometry optimization procedure, the  $^{13}\text{C}$  chemical shifts in Table S5 differ slightly from those published previously.[1]

**Table S6:** Comparison of experimental and predicted isotropic  $^1\text{H}$  chemical shifts for the 2-body, cluster, and combined cluster/2-body models with charge embedding using the PBE0 density functional and those obtained using GIPAW with the PBE density functional (in ppm). The raw chemical shieldings can be obtained from the empirically scaled chemical shieldings reported here using the linear regression parameters reported in this work. All shieldings are reported relative to TMS with adamantane at 1.87 ppm.

| Crystal               | Exp. Shifts<br>Isotropic<br>(ppm) | PBE0<br>2bd 6 Å | PBE0<br>Cluster 4 Å | PBE0<br>Cluster/<br>Fragment | PBE<br>GIPAW |
|-----------------------|-----------------------------------|-----------------|---------------------|------------------------------|--------------|
| CIMETD                | 2.24                              | 1.83            | 1.70                | 1.80                         | 2.17         |
|                       | 2.24                              | 1.94            | 1.85                | 1.92                         | 2.20         |
|                       | 7.64                              | 7.07            | 7.10                | 7.18                         | 7.42         |
|                       | 8.44                              | 8.42            | 8.38                | 8.38                         | 8.46         |
|                       | 9.94                              | 10.07           | 9.79                | 9.91                         | 9.74         |
|                       | 11.84                             | 11.54           | 11.41               | 11.52                        | 12.27        |
| INDMET                | 5.8                               | 5.72            | 5.70                | 5.64                         | 5.74         |
|                       | 6.1                               | 6.05            | 6.07                | 6.05                         | 5.96         |
|                       | 5.8                               | 5.78            | 5.79                | 5.75                         | 5.72         |
|                       | 1.7                               | 1.69            | 1.74                | 1.67                         | 1.89         |
|                       | 2.2                               | 2.18            | 2.25                | 2.17                         | 2.58         |
|                       | 1.8                               | 1.87            | 2.04                | 1.79                         | 2.12         |
|                       | 7.3                               | 6.95            | 7.02                | 6.89                         | 6.90         |
|                       | 5.7                               | 5.73            | 5.95                | 5.75                         | 5.53         |
|                       | 7.2                               | 7.09            | 7.04                | 6.93                         | 6.81         |
|                       | 7.3                               | 7.44            | 7.44                | 7.30                         | 6.97         |
| URACIL                | 11.2                              | 11.48           | 11.29               | 11.40                        | 12.00        |
|                       | 10.8                              | 10.98           | 10.92               | 11.06                        | 11.04        |
|                       | 7.5                               | 7.88            | 7.79                | 7.93                         | 7.58         |
|                       | 6                                 | 6.41            | 6.38                | 6.50                         | 6.06         |
| 4,5-Dimethylimidazole | 4.8                               | 4.57            | 4.41                | 4.61                         | 4.56         |
|                       | 1.4                               | 1.39            | 1.24                | 1.38                         | 1.47         |
|                       | 0.7                               | 1.51            | 1.39                | 1.51                         | 1.53         |
|                       | 13                                | 13.18           | 13.23               | 13.41                        | 13.46        |
| 3,5-Dimethylpyrazole  | 5.2                               | 5.54            | 5.51                | 5.51                         | 5.60         |
|                       | 1.5                               | 1.88            | 1.82                | 1.91                         | 2.05         |
|                       | 1.4                               | 2.15            | 2.14                | 2.16                         | 2.05         |
|                       | 15                                | 14.69           | 14.71               | 14.75                        | 14.54        |
| AMBACO05              | 5.8                               | 5.87            | 6.00                | 5.83                         | 5.58         |
|                       | 6.8                               | 7.03            | 7.12                | 7.00                         | 6.72         |
|                       | 5.4                               | 5.72            | 5.97                | 5.79                         | 5.91         |
| PHBARB06              | 10.3                              | 10.46           | 10.43               | 10.52                        | 11.45        |

*Continued on next page*

Table S6 – *Continued from previous page*

| Crystal  | Exp. Shifts<br>Isotropic<br>(ppm) | PBE0<br>2bd 6 Å | PBE0<br>Cluster 4 Å | PBE0<br>Cluster/<br>Fragment | PBE<br>GIPAW |
|----------|-----------------------------------|-----------------|---------------------|------------------------------|--------------|
|          | 8.1                               | 8.07            | 7.98                | 8.06                         | 8.97         |
|          | 10.3                              | 10.35           | 10.25               | 10.31                        | 11.13        |
|          | 6.9                               | 6.93            | 6.90                | 6.95                         | 6.73         |
|          | 2.7                               | 1.99            | 1.95                | 2.02                         | 2.17         |
|          | 1.7                               | 1.71            | 1.66                | 1.71                         | 1.81         |
|          | 0.6                               | -0.17           | -0.24               | -0.13                        | 0.29         |
| IPMEPL   | 0.42                              | 1.07            | 1.09                | 1.10                         | 1.29         |
|          | 1.05                              | 1.56            | 1.41                | 1.57                         | 1.63         |
|          | 1.45                              | 0.57            | 0.42                | 0.57                         | 0.71         |
|          | 3.38                              | 3.37            | 3.28                | 3.31                         | 3.35         |
|          | 5.4                               | 6.11            | 5.91                | 6.07                         | 5.76         |
|          | 9.99                              | 10.24           | 10.57               | 10.58                        | 10.36        |
| COYRUD11 | 7                                 | 7.56            | 7.62                | 7.55                         | 7.15         |
|          | 6.1                               | 6.45            | 6.73                | 6.45                         | 5.93         |
|          | 3.8                               | 3.67            | 3.92                | 3.62                         | 3.40         |
|          | 4.5                               | 4.79            | 4.81                | 4.74                         | 4.55         |
|          | 4.1                               | 4.45            | 4.72                | 4.49                         | 4.20         |
|          | 5.9                               | 5.83            | 6.06                | 5.85                         | 5.34         |
|          | 3.2                               | 3.78            | 3.94                | 3.81                         | 3.76         |
|          | 1.8                               | 2.01            | 2.08                | 2.09                         | 2.13         |
|          | 2.3                               | 2.24            | 2.34                | 2.31                         | 2.55         |
| FPAMCA11 | 8.3                               | 8.13            | 7.90                | 8.07                         | 7.66         |
|          | 6                                 | 6.06            | 5.94                | 6.07                         | 5.73         |
|          | 5.4                               | 5.32            | 5.39                | 5.39                         | 4.99         |
|          | 6.8                               | 6.91            | 6.90                | 6.92                         | 6.79         |
|          | 9.6                               | 9.59            | 9.42                | 9.52                         | 9.69         |
|          | 6.9                               | 6.85            | 6.72                | 6.79                         | 6.35         |
|          | 6.2                               | 6.41            | 6.31                | 6.37                         | 6.00         |
|          | 5.9                               | 6.04            | 5.94                | 5.95                         | 5.59         |
|          | 7.3                               | 7.33            | 7.29                | 7.32                         | 6.90         |
| BAPLOT01 | 14.6                              | 14.55           | 14.83               | 14.52                        | 14.53        |
|          | 7.7                               | 7.22            | 7.56                | 7.22                         | 7.15         |
|          | 3.4                               | 3.34            | 3.47                | 3.37                         | 3.45         |
| WEZCOT   | 7.1                               | 6.71            | 6.77                | 6.70                         | 6.95         |
|          | 9.9                               | 9.51            | 9.43                | 9.48                         | 9.04         |
|          | 8                                 | 7.82            | 7.91                | 7.88                         | 7.34         |
|          | 8                                 | 7.95            | 7.94                | 7.90                         | 8.62         |
|          | 2                                 | 1.80            | 1.88                | 1.83                         | 2.33         |
|          | 1.2                               | 1.05            | 1.13                | 1.16                         | 1.34         |
| FLUBIP   | 0.9                               | 0.94            | 0.96                | 0.94                         | 1.00         |
|          | 2.9                               | 2.67            | 2.72                | 2.66                         | 2.51         |
|          | 6.7                               | 6.57            | 6.51                | 6.50                         | 6.16         |
| ZIVKAQ   | 1.33                              | 1.01            | 1.08                | 1.13                         | 1.32         |
|          | 4.73                              | 4.39            | 4.37                | 4.43                         | 4.64         |

*Continued on next page*

Table S6 – Continued from previous page

| Crystal | Exp. Shifts<br>Isotropic<br>(ppm) | PBE0<br>2bd 6 Å | PBE0<br>Cluster 4 Å | PBE0<br>Cluster/<br>Fragment | PBE<br>GIPAW |
|---------|-----------------------------------|-----------------|---------------------|------------------------------|--------------|
|         | 6.83                              | 6.67            | 6.49                | 6.57                         | 6.37         |
|         | 6.83                              | 6.61            | 6.53                | 6.60                         | 6.36         |
|         | 6.83                              | 6.71            | 6.60                | 6.70                         | 6.61         |
|         | 10.93                             | 10.15           | 10.00               | 10.08                        | 10.32        |

**Table S7:** Comparison of experimental and predicted isotropic  $^{13}\text{C}$  **chemical shifts** for the 2-body, cluster, and combined cluster/2-body models with charge embedding using the PBE0 density functional and those obtained using GIPAW with the PBE density functional (in ppm). The raw chemical shieldings can be obtained from the empirically scaled chemical shieldings reported here using the linear regression parameters reported in this work. All shieldings are reported relative to TMS.

| Crystal  | Exp. Shifts<br>Isotropic<br>(ppm) | PBE0<br>2bd 6 Å | PBE0<br>Cluster 4 Å | PBE0<br>Cluster/<br>Fragment | PBE<br>GIPAW |
|----------|-----------------------------------|-----------------|---------------------|------------------------------|--------------|
| GLYCIN03 | 176.2                             | 179.48          | 178.21              | 178.90                       | 177.58       |
|          | 43.5                              | 43.43           | 43.65               | 43.80                        | 40.71        |
| LALNIN12 | 176.8                             | 180.96          | 180.06              | 180.24                       | 179.33       |
|          | 50.9                              | 51.23           | 51.15               | 51.15                        | 49.09        |
|          | 19.8                              | 20.80           | 20.56               | 20.59                        | 16.86        |
| LSERIN01 | 175.1                             | 177.96          | 178.32              | 177.78                       | 176.28       |
|          | 55.6                              | 55.57           | 55.78               | 55.67                        | 53.99        |
|          | 62.9                              | 64.26           | 63.98               | 63.94                        | 65.39        |
| LTYROS11 | 176                               | 178.82          | 178.10              | 178.12                       | 176.57       |
|          | 130.3                             | 129.91          | 128.33              | 129.24                       | 129.75       |
|          | 117.2                             | 116.12          | 114.84              | 115.41                       | 115.54       |
|          | 54.7                              | 56.71           | 56.82               | 56.90                        | 55.61        |
|          | 131                               | 131.41          | 132.42              | 131.94                       | 130.04       |
|          | 117.2                             | 119.38          | 120.75              | 119.56                       | 117.13       |
|          | 155.7                             | 155.56          | 155.94              | 155.83                       | 157.39       |
|          | 35.8                              | 38.06           | 37.79               | 37.88                        | 36.18        |
| 123      | 122.11                            | 120.98          | 121.69              | 121.38                       |              |
| LCYSTN21 | 175.1                             | 175.01          | 175.21              | 175.23                       | 173.47       |
|          | 53.7                              | 54.50           | 54.87               | 54.77                        | 53.56        |
|          | 35.4                              | 31.94           | 31.83               | 31.81                        | 29.69        |
| MGLUCP11 | 101                               | 100.31          | 100.34              | 100.46                       | 105.46       |
|          | 72.3                              | 70.95           | 70.34               | 70.59                        | 72.33        |
|          | 74.6                              | 73.99           | 74.10               | 73.88                        | 75.86        |
|          | 72.5                              | 71.37           | 71.78               | 71.79                        | 73.62        |
|          | 75.3                              | 73.69           | 73.61               | 73.76                        | 75.74        |
|          | 63.8                              | 63.78           | 63.01               | 63.15                        | 63.99        |
| 56.5     | 57.14                             | 56.96           | 56.82               | 57.04                        |              |
| MBDGAL02 | 105.7                             | 105.03          | 104.79              | 104.86                       | 110.34       |

Continued on next page

Table S7 – Continued from previous page

| Crystal  | Exp. Shifts<br>Isotropic<br>(ppm) | PBE0<br>2bd 6 Å | PBE0<br>Cluster 4 Å | PBE0<br>Cluster/<br>Fragment | PBE<br>GIPAW |
|----------|-----------------------------------|-----------------|---------------------|------------------------------|--------------|
|          | 71.2                              | 70.72           | 70.58               | 70.66                        | 72.39        |
|          | 72.1                              | 72.24           | 72.22               | 72.35                        | 74.33        |
|          | 69.3                              | 70.50           | 70.26               | 70.17                        | 71.92        |
|          | 75.6                              | 74.43           | 74.43               | 74.51                        | 76.67        |
|          | 62.8                              | 62.46           | 62.88               | 62.89                        | 63.67        |
|          | 57.6                              | 58.93           | 59.10               | 59.18                        | 59.04        |
| MEMANP11 | 99.6                              | 99.62           | 99.80               | 99.86                        | 104.69       |
|          | 71.3                              | 70.95           | 70.78               | 70.84                        | 72.83        |
|          | 71.7                              | 71.82           | 72.09               | 72.12                        | 73.69        |
|          | 64.8                              | 64.48           | 64.67               | 64.77                        | 65.60        |
|          | 71.9                              | 72.33           | 72.30               | 72.35                        | 73.89        |
|          | 58.9                              | 58.46           | 58.57               | 58.52                        | 58.76        |
|          | 54.9                              | 56.51           | 56.23               | 56.32                        | 55.31        |
| MGALPY01 | 100.4                             | 99.88           | 99.93               | 99.91                        | 105.34       |
|          | 67.6                              | 67.27           | 67.13               | 67.24                        | 68.28        |
|          | 72.6                              | 73.04           | 73.58               | 73.46                        | 74.71        |
|          | 70                                | 69.66           | 69.99               | 69.87                        | 71.64        |
|          | 72.9                              | 72.01           | 72.41               | 72.43                        | 74.02        |
|          | 61.4                              | 60.87           | 61.10               | 61.00                        | 62.31        |
|          | 55.2                              | 56.50           | 56.16               | 56.12                        | 55.23        |
| XYLOBM01 | 104.2                             | 103.30          | 103.09              | 103.27                       | 108.59       |
|          | 72.2                              | 71.14           | 71.58               | 71.48                        | 73.07        |
|          | 78.2                              | 76.89           | 76.61               | 76.76                        | 79.17        |
|          | 69.5                              | 69.60           | 69.07               | 69.10                        | 70.72        |
|          | 66.9                              | 66.68           | 66.40               | 66.44                        | 67.88        |
|          | 57.3                              | 57.72           | 57.48               | 57.54                        | 56.89        |
| FRUCTO02 | 65.4                              | 65.05           | 65.44               | 65.43                        | 66.13        |
|          | 99.7                              | 101.54          | 101.44              | 101.54                       | 106.54       |
|          | 67.2                              | 67.35           | 67.33               | 67.40                        | 68.37        |
|          | 69                                | 67.78           | 67.52               | 67.68                        | 68.98        |
|          | 71.4                              | 72.17           | 71.84               | 72.00                        | 74.07        |
|          | 64.9                              | 65.78           | 65.63               | 65.57                        | 66.66        |
| RHAMAH12 | 94.5                              | 94.59           | 94.80               | 94.77                        | 99.37        |
|          | 72.2                              | 71.98           | 72.14               | 72.20                        | 73.82        |
|          | 71                                | 69.67           | 69.86               | 69.86                        | 71.46        |
|          | 72.5                              | 72.91           | 72.91               | 73.05                        | 74.34        |
|          | 69.8                              | 70.19           | 70.07               | 70.18                        | 71.80        |
|          | 17.8                              | 18.29           | 18.44               | 18.43                        | 13.51        |
| SUCROS04 | 93.3                              | 92.80           | 92.95               | 92.93                        | 96.57        |
|          | 66                                | 64.77           | 64.67               | 64.67                        | 65.29        |
|          | 73.7                              | 72.98           | 73.14               | 73.15                        | 75.06        |
|          | 102.4                             | 103.25          | 103.39              | 103.43                       | 107.70       |
|          | 72.8                              | 71.91           | 72.04               | 72.04                        | 73.99        |
|          | 82.9                              | 82.00           | 81.95               | 81.97                        | 85.09        |
|          | 67.9                              | 67.20           | 67.48               | 67.57                        | 68.87        |
|          | 71.8                              | 70.83           | 70.68               | 70.64                        | 71.85        |

Continued on next page

Table S7 – Continued from previous page

| Crystal  | Exp. Shifts<br>Isotropic<br>(ppm) | PBE0<br>2bd 6 Å | PBE0<br>Cluster 4 Å | PBE0<br>Cluster/<br>Fragment | PBE<br>GIPAW |
|----------|-----------------------------------|-----------------|---------------------|------------------------------|--------------|
|          | 73.6                              | 73.42           | 73.67               | 73.54                        | 75.30        |
|          | 81.8                              | 80.39           | 80.53               | 80.48                        | 82.73        |
|          | 60                                | 58.82           | 58.98               | 58.97                        | 59.57        |
|          | 61                                | 61.23           | 61.22               | 61.19                        | 61.67        |
| GLUTAM01 | 177                               | 175.85          | 176.20              | 175.98                       | 174.26       |
|          | 54                                | 54.11           | 54.65               | 54.34                        | 52.65        |
|          | 26                                | 26.41           | 26.64               | 26.62                        | 23.99        |
|          | 29                                | 30.84           | 30.28               | 30.37                        | 26.60        |
|          | 174                               | 175.98          | 175.43              | 175.92                       | 174.71       |
| ASPARM03 | 176.4                             | 177.55          | 178.62              | 178.26                       | 177.49       |
|          | 51.8                              | 50.88           | 51.26               | 51.09                        | 49.12        |
|          | 36.1                              | 36.20           | 35.55               | 35.55                        | 32.93        |
|          | 177.1                             | 174.18          | 174.96              | 174.87                       | 173.22       |
| LSERMH10 | 175.6                             | 177.64          | 177.69              | 178.31                       | 177.04       |
|          | 58.3                              | 58.48           | 58.26               | 58.37                        | 57.63        |
|          | 61.8                              | 61.52           | 61.70               | 61.63                        | 62.58        |
| LTHREO01 | 170.0                             | 173.95          | 174.79              | 174.74                       | 172.18       |
|          | 60.2                              | 59.98           | 60.62               | 60.47                        | 59.45        |
|          | 65.4                              | 67.03           | 67.20               | 67.32                        | 68.95        |
|          | 18.9                              | 21.27           | 21.21               | 21.28                        | 16.84        |
| NAPHTA36 | 126                               | 126.02          | 125.76              | 125.88                       | 124.60       |
|          | 129.3                             | 130.12          | 129.67              | 129.93                       | 128.97       |
|          | 134.9                             | 133.33          | 133.08              | 133.31                       | 132.64       |
|          | 129.9                             | 130.32          | 130.01              | 130.17                       | 129.32       |
|          | 125.4                             | 125.32          | 125.00              | 125.13                       | 124.07       |
| ACENAP03 | 148.1                             | 149.17          | 149.65              | 149.30                       | 150.32       |
|          | 120.3                             | 120.09          | 120.12              | 119.90                       | 119.06       |
|          | 129.4                             | 130.11          | 130.22              | 129.94                       | 129.21       |
|          | 122.3                             | 122.46          | 122.61              | 122.43                       | 121.37       |
|          | 131.9                             | 130.19          | 130.44              | 130.11                       | 129.67       |
|          | 139.9                             | 138.16          | 138.20              | 137.86                       | 138.18       |
|          | 29.5                              | 30.78           | 30.80               | 30.77                        | 27.11        |
| TRIPHE11 | 126.4                             | 126.25          | 126.38              | 126.37                       | 125.45       |
|          | 129.5                             | 128.54          | 128.45              | 128.58                       | 128.12       |
|          | 124.5                             | 124.84          | 125.06              | 125.25                       | 123.61       |
|          | 125.9                             | 125.60          | 125.58              | 125.76                       | 124.52       |
|          | 127.5                             | 127.05          | 127.10              | 127.25                       | 126.23       |
|          | 122.3                             | 122.33          | 122.06              | 122.19                       | 120.93       |
|          | 130.2                             | 129.43          | 129.27              | 129.41                       | 129.06       |
|          | 129.5                             | 128.22          | 128.11              | 128.19                       | 128.09       |
|          | 120.9                             | 120.48          | 120.35              | 120.42                       | 119.16       |
|          | 125.9                             | 125.92          | 125.60              | 125.61                       | 124.91       |
|          | 121.7                             | 121.82          | 122.19              | 122.20                       | 120.79       |
|          | 129.5                             | 128.61          | 128.41              | 128.46                       | 128.29       |

Continued on next page

Table S7 – Continued from previous page

| Crystal  | Exp. Shifts<br>Isotropic<br>(ppm) | PBE0<br>2bd 6 Å | PBE0<br>Cluster 4 Å | PBE0<br>Cluster/<br>Fragment | PBE<br>GIPAW |
|----------|-----------------------------------|-----------------|---------------------|------------------------------|--------------|
|          | 129.5                             | 128.29          | 128.39              | 128.41                       | 128.01       |
|          | 122.3                             | 122.94          | 122.75              | 122.66                       | 121.27       |
|          | 126.9                             | 126.58          | 126.69              | 126.45                       | 125.53       |
|          | 126.9                             | 128.33          | 128.40              | 128.21                       | 126.90       |
|          | 123.8                             | 123.66          | 124.06              | 124.06                       | 122.63       |
|          | 129.8                             | 129.06          | 129.13              | 129.19                       | 128.79       |
| HXACAN09 | 152.3                             | 150.22          | 150.69              | 150.30                       | 152.09       |
|          | 116.4                             | 115.44          | 117.01              | 116.22                       | 115.01       |
|          | 120.6                             | 120.76          | 121.36              | 120.76                       | 119.21       |
|          | 133.1                             | 130.90          | 130.93              | 131.26                       | 131.21       |
|          | 123.4                             | 123.97          | 123.09              | 123.62                       | 122.71       |
|          | 115.7                             | 116.19          | 114.50              | 114.84                       | 113.95       |
|          | 169.8                             | 169.68          | 169.62              | 169.74                       | 166.80       |
|          | 23.8                              | 27.34           | 27.54               | 27.25                        | 22.16        |
| INDMET   | 167.7                             | 169.64          | 169.51              | 169.35                       | 168.34       |
|          | 136.7                             | 132.16          | 132.29              | 131.99                       | 132.88       |
|          | 134.4                             | 132.81          | 132.74              | 132.92                       | 132.35       |
|          | 129.2                             | 130.17          | 130.28              | 130.33                       | 130.41       |
|          | 140.3                             | 144.05          | 144.48              | 144.41                       | 145.06       |
|          | 127                               | 126.50          | 127.11              | 126.76                       | 126.47       |
|          | 132                               | 132.78          | 133.00              | 132.52                       | 132.60       |
|          | 13.7                              | 16.12           | 16.53               | 16.11                        | 11.38        |
|          | 28.2                              | 30.38           | 30.29               | 30.14                        | 26.41        |
|          | 179.2                             | 184.36          | 184.25              | 183.94                       | 183.48       |
|          | 138                               | 137.75          | 138.70              | 138.07                       | 137.86       |
|          | 55.2                              | 55.50           | 55.19               | 55.12                        | 54.39        |
|          | 112.6                             | 112.48          | 113.37              | 112.84                       | 113.61       |
|          | 131.1                             | 129.72          | 130.31              | 129.92                       | 130.32       |
|          | 97.9                              | 97.37           | 97.45               | 97.01                        | 94.52        |
|          | 156.7                             | 155.65          | 155.42              | 155.41                       | 157.33       |
|          | 112.6                             | 111.85          | 110.97              | 111.12                       | 109.64       |
|          | 115.7                             | 116.03          | 115.87              | 116.18                       | 114.26       |
|          | 131.1                             | 129.19          | 128.99              | 128.98                       | 129.06       |
| SULAMD06 | 127.1                             | 123.81          | 124.44              | 124.16                       | 125.63       |
|          | 129.5                             | 129.67          | 129.86              | 129.89                       | 128.05       |
|          | 117.1                             | 114.58          | 114.21              | 114.51                       | 114.16       |
|          | 153.4                             | 150.94          | 150.37              | 150.68                       | 149.22       |
|          | 112.3                             | 110.71          | 110.21              | 110.31                       | 110.12       |
|          | 129.5                             | 131.61          | 131.21              | 131.05                       | 130.31       |
| ADENOS12 | 154.8                             | 155.07          | 155.01              | 155.11                       | 152.39       |
|          | 148.5                             | 146.00          | 146.03              | 146.21                       | 145.48       |
|          | 119.7                             | 119.19          | 119.35              | 119.50                       | 120.22       |
|          | 155.2                             | 152.28          | 152.25              | 152.39                       | 150.34       |
|          | 137.8                             | 137.10          | 136.28              | 136.62                       | 134.92       |
|          | 92.3                              | 92.19           | 92.29               | 92.44                        | 95.93        |
|          | 71.2                              | 75.15           | 75.13               | 75.31                        | 77.06        |
|          | 75                                | 71.57           | 71.59               | 71.72                        | 73.22        |
|          | 84.9                              | 84.82           | 84.72               | 84.84                        | 87.19        |

Continued on next page



Table S7 – Continued from previous page

| Crystal  | Exp. Shifts<br>Isotropic<br>(ppm) | PBE0<br>2bd 6 Å | PBE0<br>Cluster 4 Å | PBE0<br>Cluster/<br>Fragment | PBE<br>GIPAW   |
|----------|-----------------------------------|-----------------|---------------------|------------------------------|----------------|
|          | 62.7                              | 62.79           | 62.59               | 62.70                        | 63.11          |
| PERYTO10 | 50.2<br>58.4                      | 50.59<br>58.42  | 50.64<br>58.44      | 50.65<br>58.45               | 50.20<br>58.97 |

**Table S8:** Comparison of experimental and predicted isotropic  $^{15}\text{N}$  chemical shifts for the 2-body, cluster, and combined cluster/2-body models with charge embedding using the PBE0 density functional and those obtained using GIPAW with the PBE density functional (in ppm). The raw chemical shieldings can be obtained from the empirically scaled chemical shieldings reported here using the linear regression parameters reported in this work. All shieldings are reported relative to  $\text{NH}_4\text{Cl}$  with  $\text{NH}_3(l)$  at 39.3 ppm.

| Crystal  | Exp. Shifts<br>Isotropic<br>(ppm)        | PBE0<br>2bd 6 Å                               | PBE0<br>Cluster 4 Å                           | PBE0<br>Cluster/<br>Fragment                  | PBE<br>GIPAW                                  |
|----------|------------------------------------------|-----------------------------------------------|-----------------------------------------------|-----------------------------------------------|-----------------------------------------------|
| BITZAF   | 249.5                                    | 247.58                                        | 245.73                                        | 245.30                                        | 241.16                                        |
| GEHHAD   | 261.8<br>253.6                           | 265.25<br>247.25                              | 266.93<br>244.16                              | 265.54<br>244.50                              | 262.80<br>245.17                              |
| GEHHEH   | 187.4<br>261.0                           | 179.30<br>250.79                              | 186.15<br>260.32                              | 184.10<br>264.07                              | 176.34<br>249.55                              |
| GEHHIL   | 268.5<br>261.2                           | 269.91<br>261.76                              | 268.83<br>258.40                              | 267.69<br>259.02                              | 269.81<br>256.76                              |
| LHISTD02 | 132.6<br>210.8                           | 141.54<br>209.71                              | 139.68<br>209.06                              | 141.38<br>207.41                              | 126.83<br>211.79                              |
| LHISTD13 | 132.4<br>210.6                           | 139.70<br>211.77                              | 136.98<br>212.34                              | 138.56<br>210.70                              | 139.09<br>212.39                              |
| TEJWAG   | 143.9                                    | 145.09                                        | 145.40                                        | 145.25                                        | 147.80                                        |
| GLYCIN03 | -6.5                                     | -7.20                                         | -9.49                                         | -9.82                                         | -12.77                                        |
| FUSVAQ01 | 183.2<br>174.2<br>192.2<br>120.2<br>50.2 | 181.82<br>173.91<br>191.70<br>122.87<br>46.21 | 183.14<br>171.55<br>188.09<br>126.34<br>49.15 | 180.70<br>173.10<br>189.53<br>127.08<br>49.53 | 183.20<br>172.97<br>190.78<br>127.46<br>50.94 |
| CYTSIN   | 110.2<br>165.2<br>54.2                   | 114.88<br>160.43<br>57.53                     | 112.79<br>161.61<br>55.45                     | 114.42<br>160.33<br>53.81                     | 117.21<br>165.91<br>52.86                     |
| THYMIN01 | 119.2                                    | 120.53                                        | 121.42                                        | 121.22                                        | 123.70                                        |

Continued on next page

Table S8 – *Continued from previous page*

| Crystal    | Exp. Shifts<br>Isotropic<br>(ppm)               | PBE0<br>2bd 6 Å                                       | PBE0<br>Cluster 4 Å                                   | PBE0<br>Cluster/<br>Fragment                          | PBE<br>GIPAW                                          |
|------------|-------------------------------------------------|-------------------------------------------------------|-------------------------------------------------------|-------------------------------------------------------|-------------------------------------------------------|
|            | 90.2                                            | 93.89                                                 | 95.48                                                 | 95.15                                                 | 96.98                                                 |
| URACIL     | 96.2<br>120.2                                   | 105.90<br>121.71                                      | 105.43<br>121.71                                      | 106.38<br>121.71                                      | 108.56<br>124.66                                      |
| CIMETD     | 130.5<br>213.1<br>56.6<br>43.5<br>45.8<br>149.9 | 136.00<br>214.03<br>58.48<br>43.70<br>37.26<br>146.29 | 134.75<br>214.39<br>60.82<br>43.74<br>41.24<br>149.05 | 135.93<br>213.35<br>60.00<br>44.85<br>41.21<br>148.38 | 136.80<br>212.86<br>59.75<br>43.22<br>41.85<br>146.27 |
| BAPLOT01   | 114.7<br>72.7<br>122.7<br>178.7                 | 122.84<br>76.18<br>126.27<br>177.37                   | 123.72<br>78.26<br>127.10<br>176.46                   | 123.51<br>78.67<br>126.36<br>176.91                   | 126.14<br>80.32<br>127.51<br>178.93                   |
| Compound 2 | 76.4<br>81.5<br>202.5<br>223.4<br>285.1         | 73.94<br>78.64<br>199.57<br>219.66<br>285.23          | 75.35<br>79.21<br>198.60<br>216.96<br>283.38          | 75.35<br>79.58<br>198.44<br>217.53<br>283.50          | 79.79<br>78.31<br>202.65<br>222.82<br>284.70          |
| LTYRHC10   | 8.0                                             | 5.82                                                  | 5.18                                                  | 5.20                                                  | 3.74                                                  |
| CYSCLM11   | 1.5                                             | 2.34                                                  | 0.22                                                  | 0.19                                                  | -2.29                                                 |
| LSERIN01   | -4.1                                            | -6.14                                                 | -6.68                                                 | -6.57                                                 | -9.57                                                 |
| GLUTAM01   | -1.3<br>72.1                                    | -2.71<br>75.82                                        | -3.08<br>73.26                                        | -3.37<br>73.24                                        | -6.16<br>75.15                                        |
| ASPARM03   | 0.7<br>74.9                                     | -0.99<br>79.42                                        | -2.43<br>75.11                                        | -2.54<br>75.41                                        | -4.99<br>77.66                                        |
| LCYSTN21   | -0.4                                            | -4.96                                                 | -4.35                                                 | -4.60                                                 | -7.46                                                 |
| ALUCAL04   | 3.0                                             | -0.43                                                 | 0.41                                                  | 0.31                                                  | -1.86                                                 |
| GLYHCL01   | -1.7                                            | -4.82                                                 | -3.64                                                 | -3.81                                                 | -6.30                                                 |
| LGLUAC11   | -0.4                                            | -1.76                                                 | -2.81                                                 | -2.80                                                 | -5.36                                                 |

**Table S9:** Comparison of experimental and predicted isotropic  $^{17}\text{O}$  chemical shifts for the 2-body, cluster, and combined cluster/2-body models with charge embedding using the PBE0 density functional and those obtained using GIPAW with the PBE density functional (in ppm). The raw chemical shieldings can be obtained from the empirically scaled chemical shieldings reported here using the linear regression parameters reported in this work. All shieldings are reported relative to liquid  $\text{H}_2\text{O}$ .

| Crystal  | Exp. Shifts<br>Isotropic<br>(ppm) | PBE0<br>2bd 6 Å | PBE0<br>Cluster 4 Å | PBE0<br>Cluster/<br>Fragment | PBE<br>GIPAW |
|----------|-----------------------------------|-----------------|---------------------|------------------------------|--------------|
| LALNIN12 | 285.0                             | 299.80          | 298.99              | 297.42                       | 297.39       |
|          | 268.0                             | 275.98          | 273.00              | 274.40                       | 276.50       |
| ALAHCL   | 327.8                             | 328.43          | 328.31              | 329.90                       | 325.00       |
|          | 176.7                             | 182.44          | 185.40              | 185.53                       | 185.69       |
| VALEHC11 | 351.0                             | 338.35          | 349.52              | 347.82                       | 354.01       |
|          | 181.0                             | 203.38          | 199.32              | 199.50                       | 190.23       |
| LTYRHC10 | 327.0                             | 331.77          | 332.04              | 330.01                       | 328.45       |
|          | 183.0                             | 182.34          | 183.13              | 183.60                       | 184.71       |
|          | 83.0                              | 74.71           | 78.46               | 76.83                        | 77.06        |
| CYTSIN   | 230.0                             | 212.38          | 217.55              | 218.81                       | 221.28       |
| ACANIL03 | 330.0                             | 322.65          | 319.63              | 323.39                       | 320.01       |
| BZAMID07 | 300.0                             | 288.76          | 289.72              | 290.58                       | 293.32       |
| GLYHCL01 | 336.0                             | 344.41          | 332.80              | 335.78                       | 329.94       |
|          | 185.0                             | 175.56          | 183.24              | 181.98                       | 183.52       |
| LGLUTA03 | 172.5                             | 177.64          | 179.51              | 178.85                       | 176.09       |
|          | 322.0                             | 308.08          | 307.37              | 310.82                       | 309.89       |
|          | 315.0                             | 302.36          | 298.60              | 300.14                       | 299.29       |
|          | 187.0                             | 188.01          | 186.84              | 185.35                       | 187.76       |
| MBNZAM10 | 287.0                             | 285.56          | 282.53              | 285.62                       | 289.69       |
| FEQYUW   | 183.1                             | 185.90          | 179.62              | 181.37                       | 181.45       |
|          | 342.7                             | 343.06          | 343.95              | 338.90                       | 340.34       |
| LILEUC10 | 182.6                             | 190.35          | 184.70              | 185.61                       | 187.98       |
|          | 347.1                             | 354.47          | 355.32              | 353.68                       | 353.08       |
| PHALNC01 | 353.5                             | 352.05          | 358.63              | 357.75                       | 356.82       |
|          | 178.8                             | 185.52          | 184.67              | 184.54                       | 184.71       |
| CYSCLM11 | 174.9                             | 191.50          | 179.10              | 182.07                       | 184.50       |
|          | 353.5                             | 348.48          | 357.61              | 352.42                       | 355.20       |
| TPEPHO02 | 45.0                              | 34.25           | 38.65               | 35.53                        | 34.28        |

## 4 Benzoic acid

Here we report the predicted carboxyl  $^{13}\text{C}$  and  $^{17}\text{O}$  isotropic chemical shifts for both configurations A and B of benzoic acid (Table S10). The values given in Table 5 of the main document are obtained by applying the Boltzmann weighting procedure outlined in Section 7.3 to the values in Table S10.

**Table S10:** Predicted carboxyl  $^{13}\text{C}$  and  $^{17}\text{O}$  isotropic chemical shifts for benzoic acid configurations A and B. The data is reported in ppm using fragment, cluster/fragment and GIPAW methods. The absolute shifts were scaled using the linear regression parameters provided in Table 1.

|                   | Config. A             |                      |                       | Config. B             |                      |                       |
|-------------------|-----------------------|----------------------|-----------------------|-----------------------|----------------------|-----------------------|
|                   | $^{13}\text{C}$ : C=O | $^{17}\text{O}$ : OH | $^{17}\text{O}$ : C=O | $^{13}\text{C}$ : C=O | $^{17}\text{O}$ : OH | $^{17}\text{O}$ : C=O |
| Fragment:         |                       |                      |                       |                       |                      |                       |
| OPBE              | 175.7                 | 173.1                | 271.6                 | 175.0                 | 173.1                | 281.7                 |
| PBE               | 175.6                 | 168.5                | 267.8                 | 174.8                 | 169.2                | 278.8                 |
| TPSS              | 177.0                 | 170.3                | 269.6                 | 176.3                 | 170.7                | 280.3                 |
| TPSSh             | 177.0                 | 170.2                | 270.2                 | 176.2                 | 170.7                | 280.6                 |
| PBE0              | 175.7                 | 168.9                | 269.8                 | 174.9                 | 169.6                | 279.9                 |
| B3LYP             | 176.0                 | 167.8                | 268.4                 | 175.2                 | 168.6                | 278.9                 |
| Cluster/Fragment: |                       |                      |                       |                       |                      |                       |
| OPBE              | 175.4                 | 172.6                | 281.2                 | 175.2                 | 171.9                | 285.5                 |
| PBE               | 175.2                 | 168.6                | 278.6                 | 174.9                 | 168.2                | 283.5                 |
| TPSS              | 176.7                 | 170.1                | 280.0                 | 176.4                 | 169.6                | 284.7                 |
| TPSSh             | 176.6                 | 170.1                | 280.1                 | 176.3                 | 169.7                | 284.8                 |
| PBE0              | 175.3                 | 169.2                | 279.3                 | 174.9                 | 168.8                | 284.0                 |
| B3LYP             | 175.6                 | 168.0                | 278.8                 | 175.2                 | 167.7                | 283.5                 |
| GIPAW:            |                       |                      |                       |                       |                      |                       |
| PBE               | 173.8                 | 167.8                | 280.8                 | 173.8                 | 169.9                | 280.8                 |

## 5 Conversions between chemical shift scales

Conversions between various chemical shift scales can be accomplished based on the IUPAC recommendations:[2]

Abbreviations: Magic-angle spinning (MAS), zero-angle spinning (ZAS)

**$^1\text{H}$  referencing:**  $^1\text{H}$  chemical shifts in the main text are reported on the  $\delta_{MAS}^{neat\ TMS}$  scale. On this scale, the chemical shift of solid adamantane under MAS is  $\delta_{MAS}^{neat\ TMS}(\text{adamantane}, \text{MAS}) = 1.87$  ppm. To convert to other chemical shift scales:[2]

$$\delta_{MAS}^{neat\ TMS} = \delta_{MAS}^{1\% \ TMS \ in \ CDCl_3} + 0.124 \text{ ppm}$$

For example, on the 1% TMS in  $\text{CDCl}_3$  scale,  $\delta_{MAS}^{1\% \ TMS \ in \ CDCl_3}(\text{adamantane}, \text{MAS}) = 1.75$  ppm.

**$^{13}\text{C}$  referencing:**  $^{13}\text{C}$  chemical shifts in the main text are reported on the  $\delta_{MAS}^{neat\ TMS}$  scale. On this scale, the downfield chemical shift of solid adamantane under MAS is  $\delta_{MAS}^{neat\ TMS}(\text{adamantane, MAS}) = 38.48$  ppm. To convert to other chemical shift scales:[2, 3]

$$\begin{aligned}\delta_{MAS}^{neat\ TMS} &= \delta_{ZAS}^{neat\ TMS} \\ &= \delta_{MAS}^{1\% \ TMS \ in \ CDCl_3} + 0.71 \text{ ppm} \\ &= \delta_{MAS}^{0.5\% \ DSS \ in \ D_2O} - 2.01 \text{ ppm} \\ &= \delta_{ZAS}^{0.5\% \ DSS \ in \ D_2O} - 2.67 \text{ ppm}\end{aligned}$$

**$^{15}\text{N}$  referencing:**  $^{15}\text{N}$  chemical shifts in the main text are reported on the  $\delta_{MAS}^{solid\ NH_4Cl}$  scale. To convert to other chemical shift scales:[2, 4]

$$\begin{aligned}\delta_{MAS}^{solid\ NH_4Cl} &= \delta_{MAS}^{neat\ MeNO_2} + 341.17 \text{ ppm} \\ \delta_{MAS}^{liq-NH_3} &= \delta_{ZAS}^{neat\ MeNO_2} + 380.44 \text{ ppm}\end{aligned}$$

## 6 Sample Quantum Espresso geometry optimization job

This section provides a sample Quantum Espresso geometry optimization job which mimics the procedures used in the development of the test set. Crystal structures optimized with fixed lattice parameters and this protocol should be particularly well-suited for use with the reported scaling parameters.

```
&CONTROL
    calculation = 'relax',
    restart_mode = 'from_scratch' ,
    pseudo_dir = 'upf_files' ,
    prefix = 'glycine' ,
    disk_io = 'default' ,
    verbosity = 'high' ,
    etot_conv_thr = 1.0D-4 ,
/
&SYSTEM
   ibrav = 0,
    nat = 40,
    ntyp = 4,
    ecutwfc = 80 ,
    ecutrho = 320 ,
    vdw_corr = 'DFT-D',
/
&ELECTRONS
    conv_thr = 1.D-8 ,
    mixing_beta = 0.5D0 ,
/
&IONS
ion_dynamics = "bfgs"
/

ATOMIC_SPECIES
H 1.00000 H.pbe-rrkjus.UPF
C 12.0000 C.pbe-rrkjus.UPF
N 14.0000 N.pbe-rrkjus.UPF
O 16.0000 O.pbe-rrkjus.UPF

ATOMIC_POSITIONS (crystal)
H 0.1043 0.8841 0.3413
O 0.1478613 0.858457 0.8928313
H 0.9263 0.7771 0.2423
C 0.9355415 0.854986 0.2130813
N 0.6988114 0.910176 0.2589512
H 0.7154 0.8991 0.4453
H 0.5173 0.8841 0.1433
H 0.7064 0.9881 0.2313
O 0.6941413 0.905676 0.7643110
```

C 0.9246914 0.875196 0.9335313  
O 0.3521413 0.358457 0.6071713  
O 0.8058613 0.405676 0.7356910  
C 0.5753114 0.375196 0.5664713  
H 0.5743 0.2771 0.2583  
H 0.3963 0.3841 0.1593  
C 0.5644615 0.354986 0.2869213  
N 0.8011914 0.410176 0.2410512  
H 0.7854 0.3991 0.0553  
H 0.9833 0.3841 0.3573  
H 0.7944 0.4881 0.2693  
O 0.3058613 0.094336 0.2356910  
C 0.0753114 0.124816 0.0664713  
H 0.0743 0.2231 0.7583  
C 0.0644615 0.145026 0.7869213  
N 0.3011914 0.089836 0.7410512  
H 0.2854 0.1011 0.5553  
H 0.4833 0.1161 0.8573  
H 0.2944 0.0121 0.7693  
O 0.8521413 0.141557 0.1071713  
H 0.8963 0.1161 0.6593  
O 0.6478613 0.641557 0.3928313  
O 0.1941413 0.594336 0.2643110  
C 0.4246914 0.624816 0.4335313  
H 0.4263 0.7231 0.7423  
H 0.6043 0.6161 0.8413  
C 0.4355415 0.645026 0.7130813  
N 0.1988114 0.589836 0.7589512  
H 0.2154 0.6011 0.9453  
H 0.0173 0.6161 0.6433  
H 0.2064 0.5121 0.7313

K\_POINTS automatic

3 3 3 1 1 1

CELL\_PARAMETERS angstrom

|             |             |            |
|-------------|-------------|------------|
| 5.10470000  | 0.00000000  | 0.00000000 |
| 0.00000000  | 11.97200000 | 0.00000000 |
| -2.02350669 | 0.00000000  | 5.07453271 |

## 7 Details of NMR experiments performed here

Figure S9 illustrates the the experimental  $^{15}\text{N}$  solid state NMR spectra for structures 8, and 18–27 in Figure S2. The specific chemical shifts are listed in Table S6.

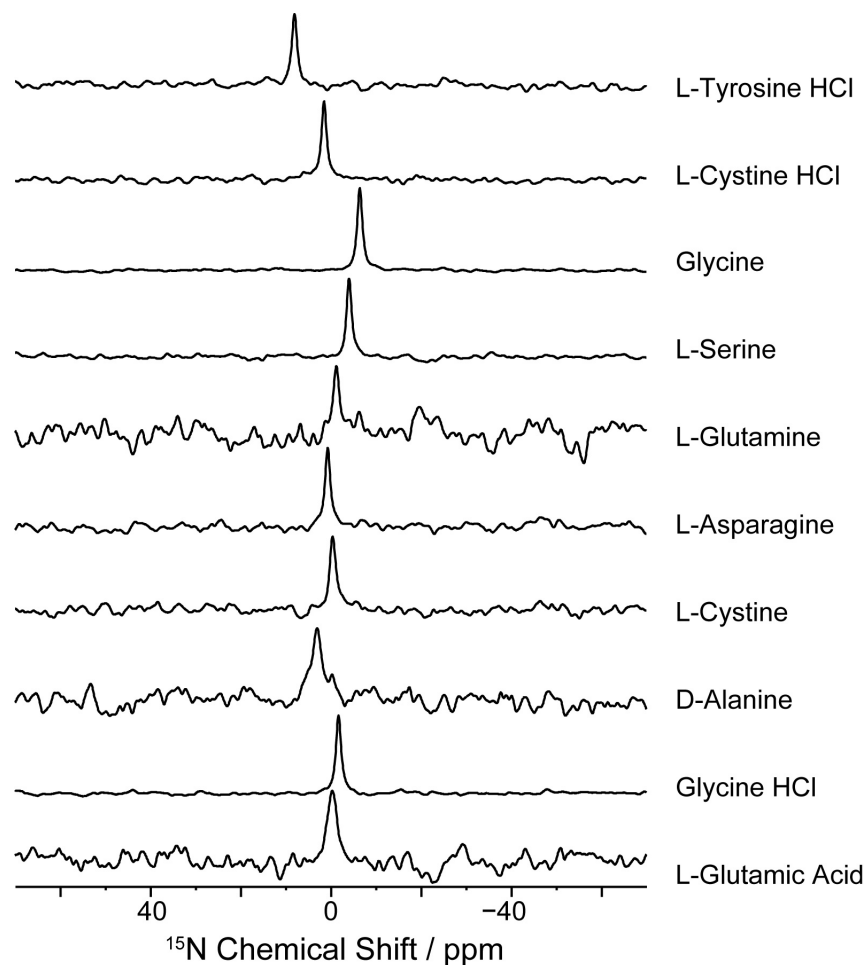

**Figure S9:** Experimental  $^{15}\text{N}$  solid state NMR spectra for structures 8, and 18–27 in the nitrogen test set.

## References

- [1] Hartman, J.D., Monaco, S., Schatschneider, B., and Beran, G.J.O. “Fragment-based  $^{13}\text{C}$  nuclear magnetic resonance chemical shift predictions in molecular crystals: An alternative to planewave methods.” *J. Chem. Phys.*, **143**, 102809 (2015).
- [2] Harris, R.K., Becker, E.D., Cabral de Menezes, S.M., Granger, P., Hoffman, R.E., and Zilm, K.W. “Further conventions for NMR shielding and chemical shifts (IUPAC Recommendations 2008).” *Pure Appl. Chem.*, **80**, 59–84 (2008). doi:10.1351/pac200880010059.
- [3] Morcombe, C.R. and Zilm, K.W. “Chemical shift referencing in MAS solid state NMR.” *J. Magn. Res.*, **162**, 479–486 (2003). doi:10.1016/S1090-7807(03)00082-X.
- [4] Hayashi, S. and Hayamizu, K. “Chemical shift standards in high-resolution solid-state NMR (2)  $^{15}\text{N}$  nuclei.” *Bull. Chem. Soc. Jpn.*, **64**, 688–690 (1991).
